# Supplementary material
Source: Springer Nature journal article supplement (https://www.springermedizin.de/resource/supplementary/12939_2013_374_MOESM3_ESM.pdf/9551012)

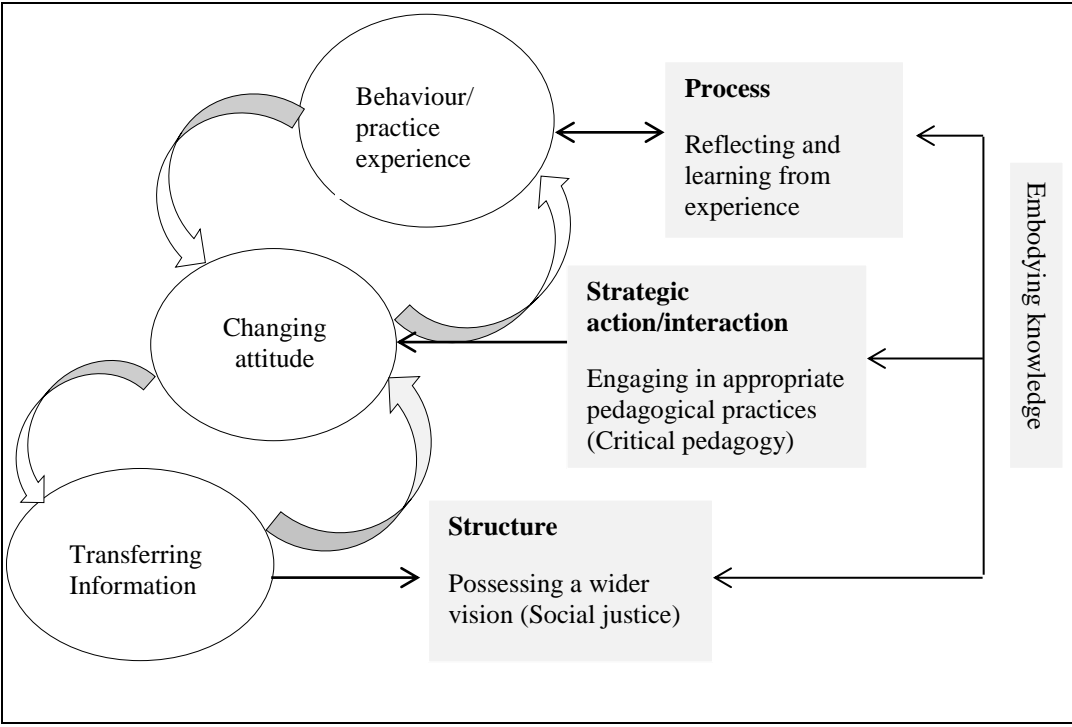

Supplement: MOESM3 [file 9551012]
